# Supplementary material for: Effect of poly(acrylic acid) on crystallization of calcium carbonate in a hydrogel
Source: Royal Society of Chemistry journal article supplement (doi:10.1039/d1ce01687c), 2022-01-01
Supplement: d1ce01687c1.pdf [file d1ce01687c1.pdf]

## **SUPPORTING INFORMATION**

### **Effect of Poly(Acrylic Acid) on Crystallization of Calcium Carbonate in a Hydrogel**

Hong Lyun Kim<sup>†</sup>, Yu Seob Shin<sup>†</sup>, and Sung Ho Yang\*

Department of Chemistry Education, Korea National University of Education, Chungbuk 28173, Korea

<sup>†</sup>These authors contributed equally.

Phone: +82-43-230-3708

\*Email: sunghoyang@knue.ac.kr

## SUPPORTING INFORMATION

### CONTENTS

**Figure S1.** The positions of the respective regions of GEL<sub>0</sub>, GEL<sub>0.01</sub>, GEL<sub>0.1</sub> and GEL<sub>1</sub> after 12h crystallization.

**Figure S2.** XRD data of CaCO<sub>3</sub> formed in a) GEL<sub>0.01</sub>, b) GEL<sub>0.1</sub>, c) GEL<sub>1</sub> and d) pristine agarose gel.

**Figure S3.** FTIR data of CaCO<sub>3</sub> formed in a) GEL<sub>0.01</sub>, b) GEL<sub>0.1</sub> and c) GEL<sub>1</sub>.

**Figure S4.** SEM micrograph of mixed region in GEL<sub>0.1</sub>.

**Figure S5.** Average size of calcite particles in GEL<sub>0.1</sub> and GEL<sub>1</sub>, which is measured by SEM micrographs.

**Figure S6.** SEM micrographs of CaCO<sub>3</sub> formed after 12h in GEL<sub>0.1</sub> with different pH of Na<sub>2</sub>CO<sub>3</sub> supernatant.

**Figure S7.** SEM micrographs of CaCO<sub>3</sub> formed after 12h in hydrogels with various concentrations of PAA.

**Figure S8.** The average particle size measured by DLS as a function of pH in a free solution in the presence 0.1 (light gray) and 1 mg/mL (dark gray) PAA.

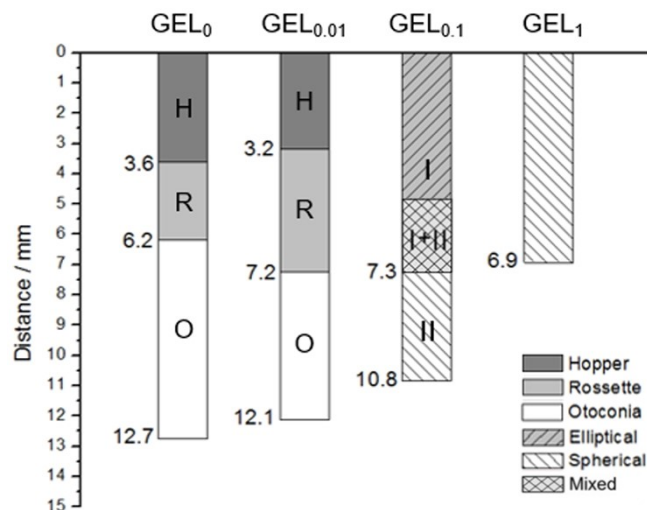

**Figure S1.** The positions of the respective regions of GEL<sub>0</sub>, GEL<sub>0.01</sub>, GEL<sub>0.1</sub> and GEL<sub>1</sub> after 12h crystallization.

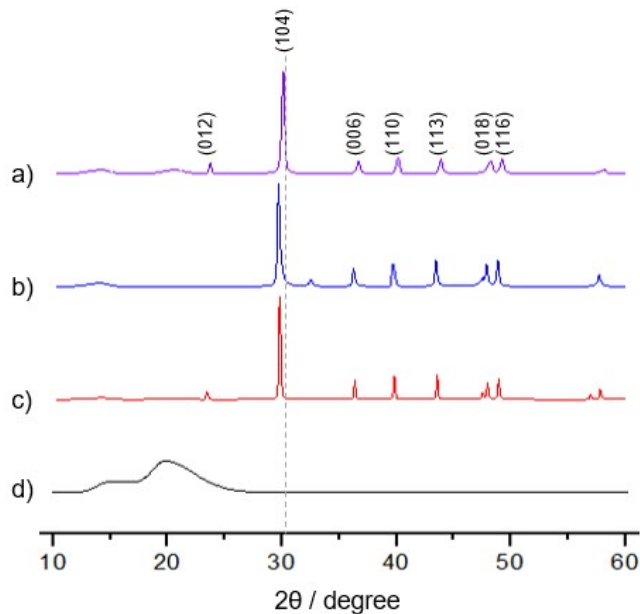

**Figure S2.** XRD data of CaCO<sub>3</sub> formed in a) GEL<sub>0.01</sub>, b) GEL<sub>0.1</sub>, c) GEL<sub>1</sub> and d) pristine agarose gel. The characteristic peaks at 29.4°, 35.9°, 39.5° were assigned as the (104), (110), and (113) facets base on reference data of calcite (JCPDF-47-1743).

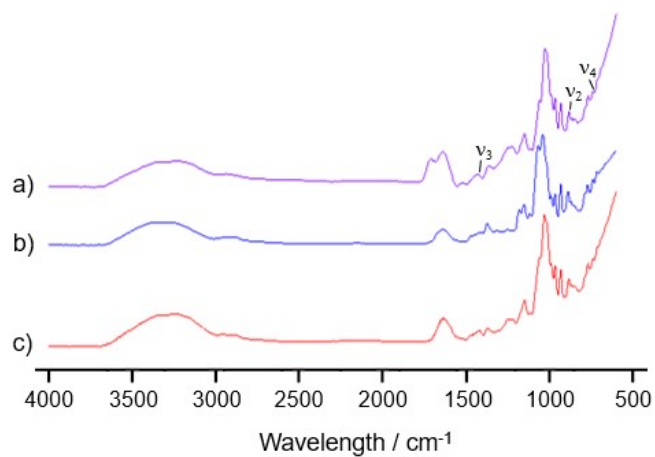

**Figure S3.** FTIR data of  $\text{CaCO}_3$  formed in a) GEL<sub>0.01</sub>, b) GEL<sub>0.1</sub> and c) GEL<sub>1</sub>. Main peaks for calcite were found at  $\sim 1420 \text{ cm}^{-1}$ ,  $\sim 880 \text{ cm}^{-1}$ , and  $\sim 710 \text{ cm}^{-1}$  in all samples, which were assigned as  $\nu_3$  (in-plane asymmetric stretching),  $\nu_2$  (out-of-plane bending) and  $\nu_4$  (in-plane bending) mode, respectively (S. Gunasekaran, G. Anbalagan and S. Pandi, J. Raman Spectra., 2006, **37**, 892-899).

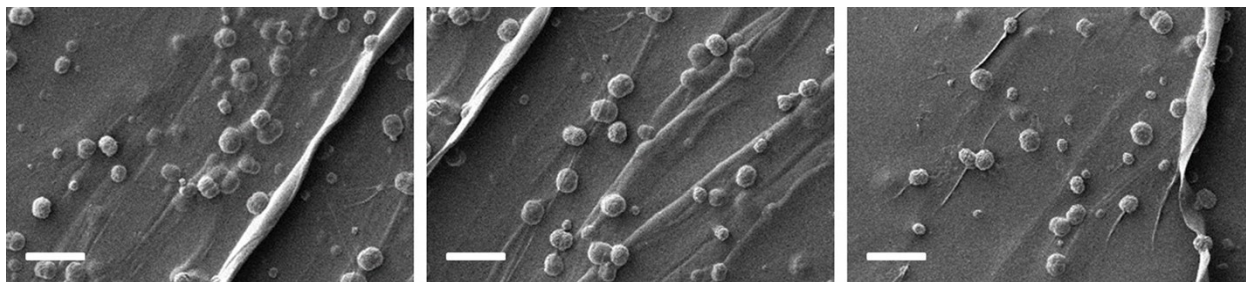

**Figure S4.** SEM micrograph of mixed region in GEL<sub>0.1</sub>. Scale bar is 50  $\mu\text{m}$ .

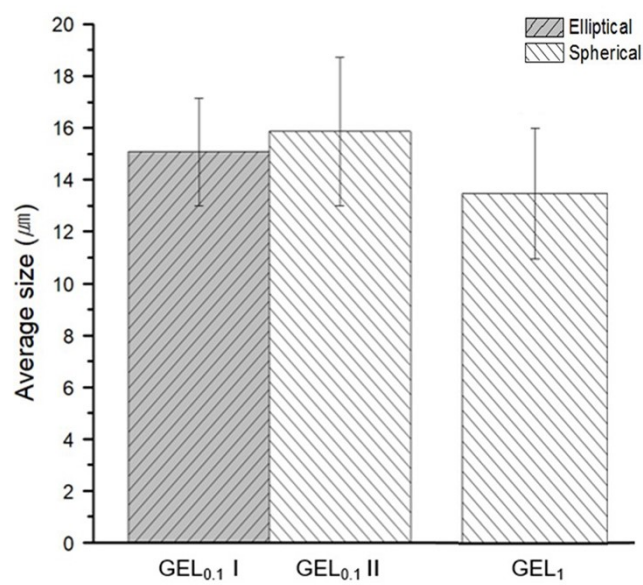

**Figure S5.** Average size of calcite particles in GEL<sub>0.1</sub> and GEL<sub>1</sub>, which is measured from SEM micrographs.

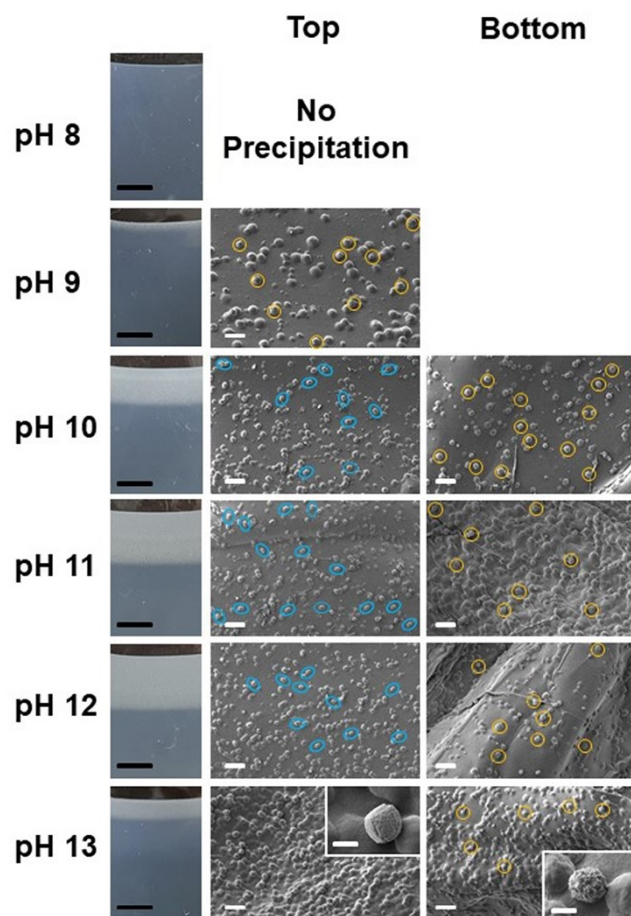

**Figure S6.** SEM micrographs of  $\text{CaCO}_3$  formed after 12h in  $\text{GEL}_{0.1}$  with different pH of  $\text{Na}_2\text{CO}_3$  reservoir. The blue oval and orange circle indicate elliptical calcite and spherical calcite, respectively. Black scale bar is 5 mm and white one is 50  $\mu\text{m}$ .

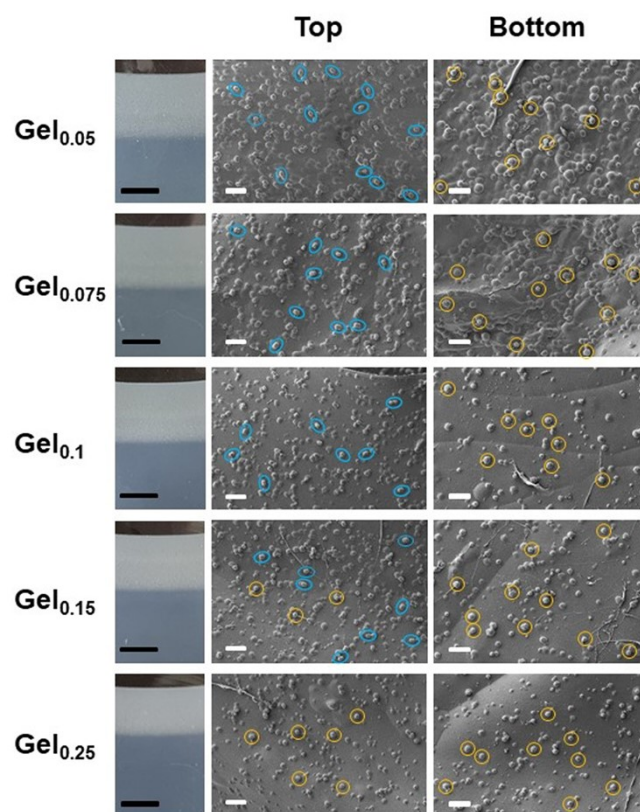

**Figure S7.** SEM micrographs of  $\text{CaCO}_3$  formed after 12h in hydrogels with various concentrations of PAA. The blue oval and orange circle indicate elliptical calcite and spherical calcite respectively. Black scale bar is 5 mm and white one is 50  $\mu\text{m}$ .

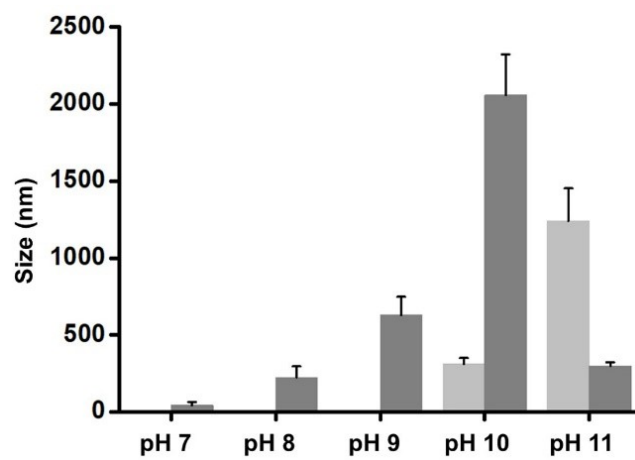

**Figure S8.** The average particle size measured by DLS as a function of pH in a free solution in the presence 0.1 (light gray) and 1 mg/mL (dark gray) PAA. The concentration of  $\text{Ca}^{2+}$  is 10 mM.
